# Supplementary material
Source: Research Square preprint supplement (doi:10.21203/rs.3.rs-9355019/v1)
Supplement: Supplementary file 1 [file 41941087bb8cfbe18adba712.docx]

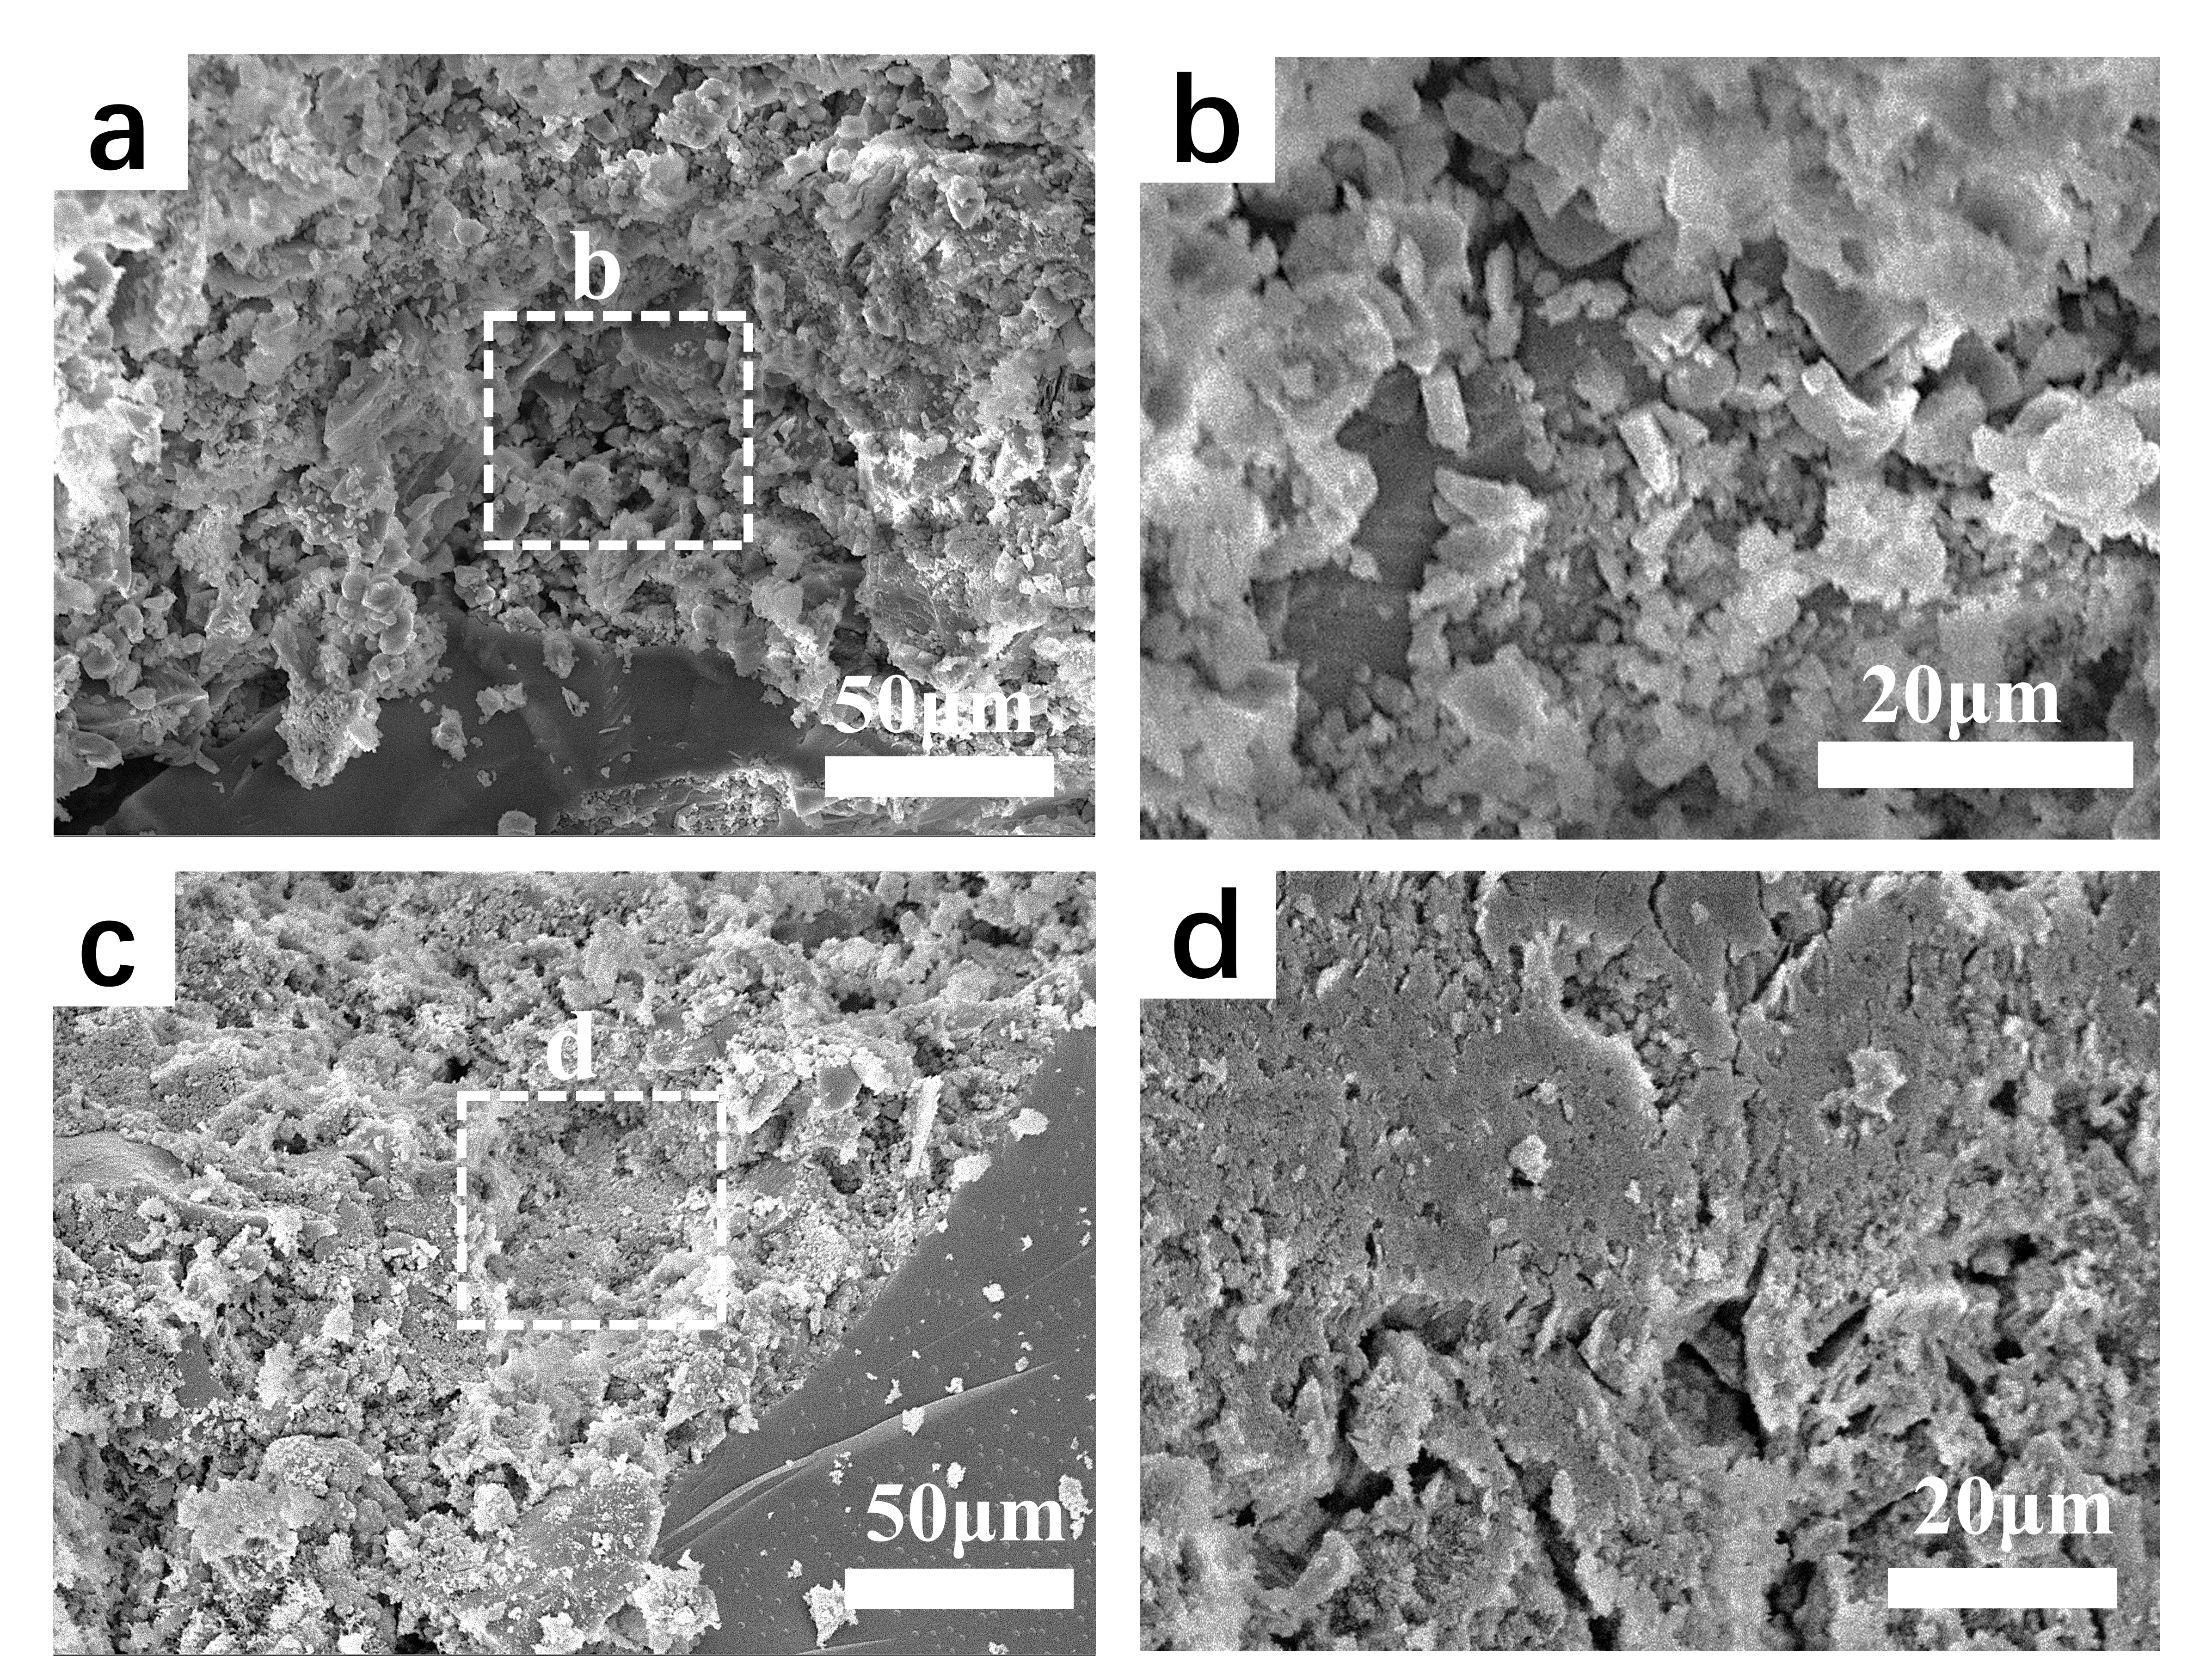


Supplementary Figure 1 SEM analyses of creamics: (a-b) SEM of 0 wt.%-ZrO2 samples after heat treatment at 1100 °C; (c-d) SEM a of 2 wt.%-ZrO2 samples after heat treatment at 1100 °C
